# Supplementary material for: DNA methylation-driven genes for constructing diagnostic, prognostic, and recurrence models for hepatocellular carcinoma
Source: PubMed Central journal article supplement (PMC6831284; doi:10.7150/thno.31155), 2019-09-25
Supplement: thnov09p7251s1.pdf [file thnov09p7251s1.pdf]

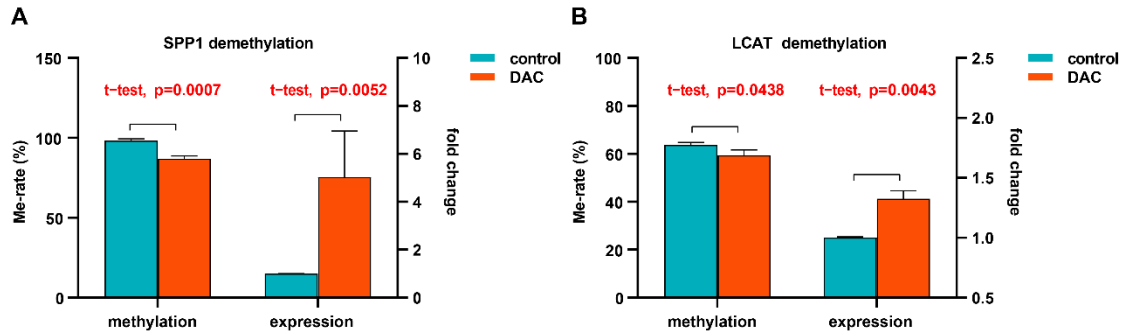

**Figure S1. Demethylation of SPP1 and LCAT by DAC.**

Levels of SPP1 (A) and LCAT (B) methylation and expression after demethylation.

**Table S1. The accession number of the sample set from TCGA.**

| The accession number of RNA-sequencing profiles of 371 HCC samples | TCGA-2Y-A9H4-01A  | TCGA-DD-AAW0-01A |
|--------------------------------------------------------------------|-------------------|------------------|
|                                                                    | TCGA-PD-A5DF-01A  | TCGA-G3-A5SK-01A |
|                                                                    | TCGA-2Y-A9H7-01A  | TCGA-DD-A4NK-01A |
|                                                                    | TCGA-2Y-A9H0-01A  | TCGA-BC-A10Y-01A |
|                                                                    | TCGA-RC-A7SF-01A  | TCGA-BC-A5W4-01A |
|                                                                    | TCGA-EP-A12J-01A  | TCGA-BC-A8YO-01A |
|                                                                    | TCGA-DD-A39V-01A  | TCGA-DD-A1EH-01A |
|                                                                    | TCGA-DD-AAD0-01A  | TCGA-DD-A4NH-01A |
|                                                                    | TCGA-DD-AADF-01A  | TCGA-2Y-A9GZ-01A |
|                                                                    | TCGA-FV-A4ZQ-01A  | TCGA-BD-A2L6-01A |
|                                                                    | TCGA-DD-AADB-01A  | TCGA-2Y-A9H8-01A |
|                                                                    | TCGA-KR-A7K8-01A  | TCGA-2V-A95S-01A |
|                                                                    | TCGA-EP-A3JL-01A  | TCGA-DD-A4NQ-01A |
|                                                                    | TCGA-BC-A69I-01A  | TCGA-CC-A9FW-01A |
|                                                                    | TCGA-BC-A217-01A  | TCGA-DD-AADS-01A |
|                                                                    | TCGA-ED-A8O5-01A  | TCGA-UB-A7ME-01A |
|                                                                    | TCGA-K7-AAU7-01A  | TCGA-CC-A9FS-01A |
|                                                                    | TCGA-ZP-A9D1-01A  | TCGA-UB-A7MA-01A |
|                                                                    | TCGA-FV-A2QR-01A  | TCGA-BW-A5NO-01A |
|                                                                    | TCGA-DD-A73F-01A  | TCGA-DD-A73C-01A |
| TCGA-ED-A97K-01A                                                   | TCGA-DD-A4NJ-01A  |                  |
| TCGA-BC-A10Z-01A                                                   | TCGA-DD-A4NI-01A  |                  |
| TCGA-G3-A25V-01A                                                   | TCGA-G3-A5SI-01A  |                  |
| TCGA-CC-A7II-01A                                                   | TCGA-G3-A5SM-01A  |                  |
| TCGA-DD-A3A6-01A                                                   | TCGA-G3-AAV6-01A  |                  |
| TCGA-DD-AAW2-01A                                                   | TCGA-DD-A1EC-01A  |                  |
| TCGA-DD-AACI-01A                                                   | TCGA-BC-A216-01A  |                  |
| TCGA-DD-A116-01A                                                   | TCGA-DD-AAACE-01A |                  |
| TCGA-DD-AAVZ-01A                                                   | TCGA-BC-A10S-01A  |                  |
| TCGA-RC-A6M3-01A                                                   | TCGA-CC-A3MC-01A  |                  |
| TCGA-DD-AADL-01A                                                   | TCGA-DD-AAACS-01A |                  |

|                  |                  |
|------------------|------------------|
| TCGA-BD-A3ER-01A | TCGA-NI-A8LF-01A |
| TCGA-CC-A1HT-01A | TCGA-UB-A7MB-01A |
| TCGA-ED-A66X-01A | TCGA-CC-A7IG-01A |
| TCGA-XR-A8TG-01A | TCGA-2Y-A9H3-01A |
| TCGA-G3-AAV4-01A | TCGA-2Y-A9H5-01A |
| TCGA-DD-A4NR-01A | TCGA-G3-A7M9-01A |
| TCGA-DD-A3A9-01A | TCGA-BC-A110-01A |
| TCGA-BC-A112-01A | TCGA-MI-A75H-01A |
| TCGA-WX-AA47-01A | TCGA-DD-AAVW-01A |
| TCGA-CC-A5UD-01A | TCGA-ED-A7PZ-01A |
| TCGA-DD-AAE4-01A | TCGA-BC-A10U-01A |
| TCGA-RG-A7D4-01A | TCGA-5R-AA1D-01A |
| TCGA-DD-A4NP-01A | TCGA-DD-AACF-01A |
| TCGA-ED-A82E-01A | TCGA-ZS-A9CG-01A |
| TCGA-DD-AAEE-01A | TCGA-G3-A7M5-01A |
| TCGA-UB-AA0U-01A | TCGA-G3-A7M7-01A |
| TCGA-RC-A7SH-01A | TCGA-CC-A3MA-01A |
| TCGA-CC-A7IL-01A | TCGA-DD-AACU-01A |
| TCGA-G3-A3CI-01A | TCGA-UB-A7MC-01A |
| TCGA-DD-AAEB-01A | TCGA-DD-AAEH-01A |
| TCGA-EP-A26S-01A | TCGA-DD-A3A4-01A |
| TCGA-CC-5261-01A | TCGA-BW-A5NP-01A |
| TCGA-CC-A8HS-01A | TCGA-DD-AAEK-01A |
| TCGA-DD-A4NO-01A | TCGA-EP-A2KA-01A |
| TCGA-DD-A11A-01A | TCGA-EP-A3RK-01A |
| TCGA-ED-A7PY-01A | TCGA-G3-A3CH-01A |
| TCGA-DD-AAVR-01A | TCGA-DD-AADK-01A |
| TCGA-DD-AAD5-01A | TCGA-DD-A4NA-01A |
| TCGA-DD-AAE3-01A | TCGA-CC-5263-01A |
| TCGA-DD-A4NN-01A | TCGA-5C-A9VG-01A |
| TCGA-RC-A7SK-01A | TCGA-2Y-A9GV-01A |
| TCGA-G3-A5SL-01A | TCGA-ZP-A9CY-01A |
| TCGA-DD-AAW3-01A | TCGA-DD-A73A-01A |
| TCGA-DD-A4NS-01A | TCGA-DD-AAD3-01A |
| TCGA-DD-A39X-01A | TCGA-WQ-A9G7-01A |
| TCGA-CC-5259-01A | TCGA-CC-A123-01A |
| TCGA-ED-A5KG-01A | TCGA-WQ-AB4B-01A |
| TCGA-GJ-A6C0-01A | TCGA-ES-A2HS-01A |
| TCGA-DD-A3A5-01A | TCGA-CC-A7IF-01A |
| TCGA-BC-A10Q-01A | TCGA-ZP-A9D2-01A |
| TCGA-DD-AACN-01A | TCGA-ZS-A9CD-01A |
| TCGA-DD-AAE6-01A | TCGA-DD-AAD1-01A |
| TCGA-2Y-A9H6-01A | TCGA-DD-A3A2-01A |

|                  |                  |
|------------------|------------------|
| TCGA-DD-AADG-01A | TCGA-HP-A5MZ-01A |
| TCGA-FV-A4ZP-01A | TCGA-G3-A25Y-01A |
| TCGA-G3-A25T-01A | TCGA-DD-A4NV-01A |
| TCGA-DD-AAVS-01A | TCGA-5C-A9VH-01A |
| TCGA-DD-AACQ-01A | TCGA-KR-A7K2-01A |
| TCGA-DD-A11C-01A | TCGA-EP-A2KC-01A |
| TCGA-DD-AADC-01A | TCGA-G3-AAUZ-01A |
| TCGA-DD-A39Y-01A | TCGA-DD-A1EJ-01A |
| TCGA-DD-AA3A-01A | TCGA-RC-A7S9-01A |
| TCGA-CC-A7IE-01A | TCGA-DD-AAC8-01A |
| TCGA-EP-A2KB-01A | TCGA-ZS-A9CE-01A |
| TCGA-DD-A4NE-01A | TCGA-K7-A5RF-01A |
| TCGA-O8-A75V-01A | TCGA-DD-AADO-01A |
| TCGA-ZP-A9D0-01A | TCGA-DD-A39W-01A |
| TCGA-DD-A11B-01A | TCGA-G3-AAV0-01A |
| TCGA-G3-A6UC-01A | TCGA-DD-A73D-01A |
| TCGA-CC-A3M9-01A | TCGA-DD-A11D-01A |
| TCGA-2Y-A9H2-01A | TCGA-DD-AACJ-01A |
| TCGA-XR-A8TF-01A | TCGA-ES-A2HT-01A |
| TCGA-DD-AACX-01A | TCGA-CC-A3MB-01A |
| TCGA-G3-AAV1-01A | TCGA-CC-5258-01A |
| TCGA-ZP-A9D4-01A | TCGA-HP-A5N0-01A |
| TCGA-ED-A66Y-01A | TCGA-WX-AA46-01A |
| TCGA-NI-A4U2-01A | TCGA-DD-A4NB-01A |
| TCGA-XR-A8TC-01A | TCGA-DD-AADM-01A |
| TCGA-DD-AACC-01A | TCGA-DD-AACZ-01A |
| TCGA-G3-A25S-01A | TCGA-DD-AAW1-01A |
| TCGA-QA-A7B7-01A | TCGA-2Y-A9H1-01A |
| TCGA-DD-AACW-01A | TCGA-ED-A7PX-01A |
| TCGA-G3-A7M8-01A | TCGA-DD-A118-01A |
| TCGA-DD-A73B-01A | TCGA-G3-A3CG-01A |
| TCGA-CC-A7IK-01A | TCGA-DD-AADN-01A |
| TCGA-DD-AAVX-01A | TCGA-DD-AAVP-01A |
| TCGA-DD-AAEI-01A | TCGA-DD-AAEG-01A |
| TCGA-BC-A3KG-01A | TCGA-G3-A3CK-01A |
| TCGA-K7-A6G5-01A | TCGA-DD-AACG-01A |
| TCGA-G3-A25Z-01A | TCGA-ZS-A9CF-01A |
| TCGA-DD-AAE1-01A | TCGA-BC-4073-01B |
| TCGA-DD-AACB-01A | TCGA-DD-AADQ-01A |
| TCGA-LG-A9QC-01A | TCGA-DD-AAD8-01A |
| TCGA-2Y-A9GU-01A | TCGA-DD-AAVY-01A |
| TCGA-RC-A6M5-01A | TCGA-MI-A75G-01A |
| TCGA-DD-A3A3-01A | TCGA-DD-A4ND-01A |

|                  |                  |
|------------------|------------------|
| TCGA-DD-A73G-01A | TCGA-MI-A75E-01A |
| TCGA-DD-A114-01A | TCGA-DD-A39Z-01A |
| TCGA-ED-A806-01A | TCGA-RC-A6M4-01A |
| TCGA-G3-A3CJ-01A | TCGA-DD-AACP-01A |
| TCGA-CC-5262-01A | TCGA-XR-A8TE-01A |
| TCGA-CC-A5UE-01A | TCGA-DD-AADR-01A |
| TCGA-DD-A4NF-01A | TCGA-G3-A7M6-01A |
| TCGA-2Y-A9GY-01A | TCGA-DD-AAD6-01A |
| TCGA-LG-A9QD-01A | TCGA-DD-AAED-01A |
| TCGA-FV-A23B-01A | TCGA-DD-AADW-01A |
| TCGA-DD-A1EF-01A | TCGA-FV-A495-01A |
| TCGA-DD-A4NG-01A | TCGA-DD-AAC9-01A |
| TCGA-DD-AADP-01A | TCGA-DD-AADY-01A |
| TCGA-FV-A3R3-01A | TCGA-DD-AAEA-01A |
| TCGA-G3-AAV3-01A | TCGA-BC-A3KF-01A |
| TCGA-BD-A3EP-01A | TCGA-CC-A5UC-01A |
| TCGA-MI-A75I-01A | TCGA-CC-A8HV-01A |
| TCGA-DD-A1EL-01A | TCGA-BC-A10X-01A |
| TCGA-2Y-A9GX-01A | TCGA-WX-AA44-01A |
| TCGA-DD-A4NL-01A | TCGA-KR-A7K0-01A |
| TCGA-BW-A5NQ-01A | TCGA-DD-AACL-01A |
| TCGA-CC-5260-01A | TCGA-ED-A627-01A |
| TCGA-ED-A7XO-01A | TCGA-ED-A459-01A |
| TCGA-2Y-A9GS-01A | TCGA-DD-AACO-01A |
| TCGA-DD-A1EE-01A | TCGA-DD-AACV-01A |
| TCGA-DD-A3A7-01A | TCGA-DD-A1EK-01A |
| TCGA-DD-AADA-01A | TCGA-FV-A3I0-01A |
| TCGA-DD-AACD-01A | TCGA-G3-AAV7-01A |
| TCGA-MI-A75C-01A | TCGA-DD-AAE2-01A |
| TCGA-FV-A2QQ-01A | TCGA-ZP-A9CZ-01A |
| TCGA-BC-A10W-01A | TCGA-DD-A3A8-01A |
| TCGA-BC-A10R-01A | TCGA-BC-A69H-01A |
| TCGA-ZP-A9CV-01A | TCGA-G3-AAV5-01A |
| TCGA-DD-AACT-01A | TCGA-CC-A8HU-01A |
| TCGA-DD-A1ED-01A | TCGA-ED-A4XI-01A |
| TCGA-DD-AAVQ-01A | TCGA-CC-A9FV-01A |
| TCGA-2Y-A9H9-01A | TCGA-CC-A8HT-01A |
| TCGA-4R-AA8I-01A | TCGA-KR-A7K7-01A |
| TCGA-UB-AA0V-01A | TCGA-DD-A1EG-01A |
| TCGA-3K-AAZ8-01A | TCGA-GJ-A3OU-01A |
| TCGA-DD-AACA-01A | TCGA-DD-AAE9-01A |
| TCGA-DD-AAVU-01A | TCGA-DD-A1EA-01A |
| TCGA-MR-A8JO-01A | TCGA-FV-A3I1-01A |

|                                                                                        |                  |                  |
|----------------------------------------------------------------------------------------|------------------|------------------|
|                                                                                        | TCGA-BC-A10T-01A | TCGA-YA-A8S7-01A |
|                                                                                        | TCGA-DD-AAD2-01A | TCGA-DD-AADD-01A |
|                                                                                        | TCGA-UB-A7MF-01A | TCGA-DD-AAVV-01A |
|                                                                                        | TCGA-CC-A7IH-01A | TCGA-G3-AAV2-01A |
|                                                                                        | TCGA-DD-AADI-01A | TCGA-G3-A25X-01A |
|                                                                                        | TCGA-RC-A6M6-01A | TCGA-CC-A9FU-01A |
|                                                                                        | TCGA-RC-A7SB-01A | TCGA-DD-A1EI-01A |
|                                                                                        | TCGA-DD-A3A1-01A | TCGA-DD-A73E-01A |
|                                                                                        | TCGA-5R-AA1C-01A | TCGA-T1-A6J8-01A |
|                                                                                        | TCGA-ED-A7XP-01A | TCGA-MR-A520-01A |
|                                                                                        | TCGA-2Y-A9HB-01A | TCGA-2Y-A9GW-01A |
|                                                                                        | TCGA-XR-A8TD-01A | TCGA-G3-A5SJ-01A |
|                                                                                        | TCGA-5C-AAPD-01A | TCGA-DD-AADJ-01A |
|                                                                                        | TCGA-LG-A6GG-01A | TCGA-DD-AAE0-01A |
|                                                                                        | TCGA-FV-A3R2-01A | TCGA-FV-A496-01A |
|                                                                                        | TCGA-2Y-A9GT-01A | TCGA-DD-AAE7-01A |
|                                                                                        | TCGA-DD-A1EB-01A | TCGA-CC-A7IJ-01A |
|                                                                                        | TCGA-GJ-A9DB-01A | TCGA-DD-AADV-01A |
|                                                                                        | TCGA-K7-A5RG-01A | TCGA-DD-AACY-01A |
|                                                                                        | TCGA-2Y-A9HA-01A | TCGA-DD-AACH-01A |
|                                                                                        | TCGA-5R-AAAM-01A | TCGA-DD-A113-01A |
|                                                                                        | TCGA-G3-A25U-01A | TCGA-DD-A115-01A |
|                                                                                        | TCGA-BC-4072-01B | TCGA-DD-AADU-01A |
|                                                                                        | TCGA-CC-5264-01A | TCGA-DD-AACK-01A |
|                                                                                        | TCGA-UB-A7MD-01A | TCGA-WJ-A86L-01A |
|                                                                                        | TCGA-DD-A119-01A |                  |
| <b>The accession number of RNA-sequencing profiles of 50 adjacent nontumor samples</b> | TCGA-FV-A23B-11A | TCGA-DD-A39V-11A |
|                                                                                        | TCGA-BC-A216-11A | TCGA-DD-A3A3-11A |
|                                                                                        | TCGA-BC-A10T-11A | TCGA-DD-A1EL-11A |
|                                                                                        | TCGA-BC-A10U-11A | TCGA-FV-A3R2-11A |
|                                                                                        | TCGA-DD-A3A5-11A | TCGA-DD-A1EI-11A |
|                                                                                        | TCGA-G3-A3CH-11A | TCGA-BC-A110-11A |
|                                                                                        | TCGA-DD-A39X-11A | TCGA-BC-A10R-11A |
|                                                                                        | TCGA-DD-A1EC-11A | TCGA-DD-A1EE-11A |
|                                                                                        | TCGA-EP-A26S-11A | TCGA-DD-A118-11A |
|                                                                                        | TCGA-DD-A39Z-11A | TCGA-FV-A2QR-11A |
|                                                                                        | TCGA-BC-A10W-11A | TCGA-DD-A3A1-11A |
|                                                                                        | TCGA-BC-A10X-11A | TCGA-DD-A3A6-11A |
|                                                                                        | TCGA-BC-A10Z-11A | TCGA-DD-A3A8-11A |
|                                                                                        | TCGA-DD-A3A4-11A | TCGA-DD-A39W-11A |
|                                                                                        | TCGA-DD-A119-11A | TCGA-DD-A11A-11A |
|                                                                                        | TCGA-DD-A116-11A | TCGA-DD-A11D-11A |
|                                                                                        | TCGA-DD-A11C-11A | TCGA-DD-A11B-11A |

|                                                                            |                  |                  |
|----------------------------------------------------------------------------|------------------|------------------|
|                                                                            | TCGA-ES-A2HT-11A | TCGA-DD-A114-11A |
|                                                                            | TCGA-EP-A12J-11A | TCGA-BD-A3EP-11A |
|                                                                            | TCGA-FV-A3I0-11A | TCGA-DD-A3A2-11A |
|                                                                            | TCGA-EP-A3RK-11A | TCGA-DD-A113-11A |
|                                                                            | TCGA-BD-A2L6-11A | TCGA-DD-A1EB-11A |
|                                                                            | TCGA-DD-A1EH-11A | TCGA-BC-A10Y-11A |
|                                                                            | TCGA-DD-A1EG-11A | TCGA-DD-A1EJ-11A |
|                                                                            | TCGA-FV-A3I1-11A | TCGA-BC-A10Q-11A |
| <b>The accession number of DNA methylation profiles of 380 HCC samples</b> | TCGA-ZP-A9D0-01A | TCGA-DD-AACG-01A |
|                                                                            | TCGA-DD-A1EJ-01A | TCGA-HP-A5MZ-01A |
|                                                                            | TCGA-CC-A8HT-01A | TCGA-BC-A3KF-01A |
|                                                                            | TCGA-WX-AA44-01A | TCGA-DD-AAD2-01A |
|                                                                            | TCGA-FV-A496-01A | TCGA-O8-A75V-01A |
|                                                                            | TCGA-4R-AA8I-01A | TCGA-G3-A7M5-01A |
|                                                                            | TCGA-G3-A5SJ-01A | TCGA-ZS-A9CD-01A |
|                                                                            | TCGA-DD-AAD3-01A | TCGA-DD-AAE8-01A |
|                                                                            | TCGA-EP-A3JL-01A | TCGA-ED-A97K-01A |
|                                                                            | TCGA-DD-A3A9-01A | TCGA-G3-A7M9-01A |
|                                                                            | TCGA-CC-A8HU-01A | TCGA-DD-AAW0-01A |
|                                                                            | TCGA-2Y-A9H7-01A | TCGA-BC-4073-01B |
|                                                                            | TCGA-K7-A5RG-01A | TCGA-DD-AACY-01A |
|                                                                            | TCGA-CC-A7IE-01A | TCGA-DD-AADF-01A |
|                                                                            | TCGA-DD-AADI-01A | TCGA-XR-A8TD-01A |
|                                                                            | TCGA-G3-A5SK-01A | TCGA-G3-A25S-01A |
|                                                                            | TCGA-NI-A4U2-01A | TCGA-MI-A75C-01A |
|                                                                            | TCGA-CC-A7IG-01A | TCGA-BC-A112-01A |
|                                                                            | TCGA-DD-AADC-01A | TCGA-G3-AAV5-01A |
|                                                                            | TCGA-DD-A4NB-01A | TCGA-DD-A1EH-01A |
|                                                                            | TCGA-DD-A4NE-01A | TCGA-DD-A1EA-01A |
|                                                                            | TCGA-DD-AACM-01A | TCGA-DD-A73F-01A |
|                                                                            | TCGA-DD-A1EL-01A | TCGA-CC-A123-01A |
|                                                                            | TCGA-DD-AADW-01A | TCGA-EP-A26S-01A |
|                                                                            | TCGA-CC-A9FW-01A | TCGA-DD-A39Z-01A |
|                                                                            | TCGA-DD-AAE6-01A | TCGA-5C-AAPD-01A |
|                                                                            | TCGA-WQ-AB4B-01A | TCGA-DD-AAVU-01A |
|                                                                            | TCGA-CC-A3M9-01A | TCGA-CC-A5UC-01A |
|                                                                            | TCGA-BC-A5W4-01A | TCGA-G3-A5SL-01A |
|                                                                            | TCGA-DD-AAW1-01A | TCGA-EP-A2KA-01A |
| TCGA-BC-A69H-01A                                                           | TCGA-2Y-A9GY-01A |                  |
| TCGA-DD-AACQ-01A                                                           | TCGA-ED-A66X-01A |                  |
| TCGA-G3-AAV2-01A                                                           | TCGA-ES-A2HT-01A |                  |
| TCGA-DD-A4NS-01A                                                           | TCGA-2Y-A9H1-01A |                  |
| TCGA-DD-AAD0-01A                                                           | TCGA-WQ-A9G7-01A |                  |

|                  |                  |
|------------------|------------------|
| TCGA-G3-AAV7-01A | TCGA-DD-A3A7-01A |
| TCGA-BC-4072-01B | TCGA-DD-AAW3-01A |
| TCGA-2Y-A9H8-01A | TCGA-DD-AADD-01A |
| TCGA-2Y-A9GW-01A | TCGA-DD-A73B-01A |
| TCGA-UB-AA0U-01A | TCGA-DD-AAEA-01A |
| TCGA-G3-A3CK-01A | TCGA-DD-A1EE-01A |
| TCGA-CC-A9FU-01A | TCGA-G3-AAV6-01A |
| TCGA-DD-A4NV-01A | TCGA-EP-A3RK-01A |
| TCGA-G3-AAV4-01A | TCGA-DD-AACF-01A |
| TCGA-DD-AAVS-01A | TCGA-FV-A3R3-01A |
| TCGA-CC-A7IJ-01A | TCGA-G3-A25U-01A |
| TCGA-DD-AADS-01A | TCGA-DD-AAVW-01A |
| TCGA-DD-AACA-02B | TCGA-ED-A7XP-01A |
| TCGA-DD-A4NJ-01A | TCGA-K7-A5RF-01A |
| TCGA-G3-A25T-01A | TCGA-DD-A3A3-01A |
| TCGA-DD-A11B-01A | TCGA-HP-A5N0-01A |
| TCGA-BC-A216-01A | TCGA-DD-AACA-02A |
| TCGA-ED-A66Y-01A | TCGA-2Y-A9HB-01A |
| TCGA-DD-AADJ-01A | TCGA-DD-A3A6-01A |
| TCGA-RC-A6M5-01A | TCGA-PD-A5DF-01A |
| TCGA-DD-A3A5-01A | TCGA-BD-A2L6-01A |
| TCGA-DD-AADY-01A | TCGA-BC-A10Q-01A |
| TCGA-G3-AAV3-01A | TCGA-5R-AAAM-01A |
| TCGA-YA-A8S7-01A | TCGA-DD-A1EB-01A |
| TCGA-ZP-A9D1-01A | TCGA-DD-AACP-01A |
| TCGA-DD-AACV-01A | TCGA-DD-AADM-01A |
| TCGA-DD-A3A4-01A | TCGA-ZS-A9CG-01A |
| TCGA-DD-AAVX-01A | TCGA-DD-AADA-01A |
| TCGA-DD-AAE7-01A | TCGA-CC-A1HT-01A |
| TCGA-CC-A5UE-01A | TCGA-FV-A3I0-01A |
| TCGA-ED-A7PZ-01A | TCGA-ED-A7PY-01A |
| TCGA-DD-AAEB-01A | TCGA-RC-A6M3-01A |
| TCGA-DD-AACI-01A | TCGA-2Y-A9H9-01A |
| TCGA-DD-AACE-01A | TCGA-ES-A2HS-01A |
| TCGA-2Y-A9GZ-01A | TCGA-DD-AACC-01A |
| TCGA-DD-A4NO-01A | TCGA-DD-AAD5-01A |
| TCGA-DD-A73E-01A | TCGA-DD-A1EK-01A |
| TCGA-BC-A10T-01A | TCGA-DD-AAEE-01A |
| TCGA-2Y-A9GX-01A | TCGA-K7-AAU7-01A |
| TCGA-CC-A7IH-01A | TCGA-BC-A10W-01A |
| TCGA-FV-A2QR-01A | TCGA-MI-A75G-01A |
| TCGA-CC-A3MC-01A | TCGA-DD-AAE1-01A |
| TCGA-G3-A5SM-01A | TCGA-DD-A119-01A |

|                  |                   |
|------------------|-------------------|
| TCGA-DD-AAVP-01A | TCGA-QA-A7B7-01A  |
| TCGA-DD-AAEH-01A | TCGA-DD-A4NI-01A  |
| TCGA-G3-AAV0-01A | TCGA-DD-A1EI-01A  |
| TCGA-ZP-A9CZ-01A | TCGA-DD-A73G-01A  |
| TCGA-DD-A4NF-01A | TCGA-K7-A6G5-01A  |
| TCGA-RG-A7D4-01A | TCGA-DD-AACA-01A  |
| TCGA-DD-AACL-01A | TCGA-CC-A8HV-01A  |
| TCGA-2V-A95S-01A | TCGA-CC-A7IK-01A  |
| TCGA-DD-A114-01A | TCGA-5C-A9VH-01A  |
| TCGA-DD-A116-01A | TCGA-LG-A9QC-01A  |
| TCGA-DD-A4NL-01A | TCGA-DD-A4NH-01A  |
| TCGA-DD-AAC8-01A | TCGA-XR-A8TC-01A  |
| TCGA-2Y-A9GU-01A | TCGA-DD-AAACK-01A |
| TCGA-CC-A9FS-01A | TCGA-MR-A8JO-01A  |
| TCGA-ZP-A9D4-01A | TCGA-EP-A2KC-01A  |
| TCGA-DD-AAEI-01A | TCGA-DD-A115-01A  |
| TCGA-DD-A4NG-01A | TCGA-DD-AACN-01A  |
| TCGA-DD-A3A2-01A | TCGA-ZS-A9CF-01A  |
| TCGA-DD-A4NN-01A | TCGA-UB-A7MD-01A  |
| TCGA-DD-AAE0-01A | TCGA-DD-A39X-01A  |
| TCGA-5R-AA1D-01A | TCGA-G3-A3CJ-01A  |
| TCGA-UB-AA0V-01A | TCGA-CC-5262-01A  |
| TCGA-ED-A82E-01A | TCGA-DD-AACS-01A  |
| TCGA-DD-A39V-01A | TCGA-WJ-A86L-01A  |
| TCGA-DD-AADK-01A | TCGA-DD-AAE2-01A  |
| TCGA-G3-A7M8-01A | TCGA-DD-A1ED-01A  |
| TCGA-G3-A3CH-01A | TCGA-DD-A73C-01A  |
| TCGA-RC-A7SH-01A | TCGA-EP-A12J-01A  |
| TCGA-G3-A7M6-01A | TCGA-DD-AAD8-01A  |
| TCGA-ED-A627-01A | TCGA-CC-5264-01A  |
| TCGA-ZP-A9D2-01A | TCGA-DD-A1EG-01A  |
| TCGA-G3-A25W-01A | TCGA-DD-A1E9-01A  |
| TCGA-GJ-A3OU-01A | TCGA-BD-A3EP-01A  |
| TCGA-T1-A6J8-01A | TCGA-ZS-A9CF-02A  |
| TCGA-GJ-A9DB-01A | TCGA-BC-A10Z-01A  |
| TCGA-MI-A75E-01A | TCGA-ED-A7PX-01A  |
| TCGA-BC-A3KG-01A | TCGA-DD-AADP-01A  |
| TCGA-CC-A7IF-01A | TCGA-EP-A2KB-01A  |
| TCGA-DD-AAE9-01A | TCGA-2Y-A9HA-01A  |
| TCGA-UB-A7MB-01A | TCGA-BC-A10U-01A  |
| TCGA-ED-A8O6-01A | TCGA-DD-A4NP-01A  |
| TCGA-DD-A39W-01A | TCGA-DD-AAVZ-01A  |
| TCGA-KR-A7K7-01A | TCGA-BC-A110-01A  |



|                  |                  |
|------------------|------------------|
| TCGA-G3-A6UC-01A | TCGA-RC-A6M6-01A |
| TCGA-G3-A25Y-01A | TCGA-DD-A3A8-01A |
| TCGA-DD-AAED-01A | TCGA-CC-5258-01A |
| TCGA-DD-A4NA-01A | TCGA-XR-A8TE-01A |
| TCGA-UB-A7MF-01A | TCGA-DD-A113-01A |
| TCGA-ED-A5KG-01A | TCGA-FV-A3R2-01A |
| TCGA-DD-AACD-01A | TCGA-CC-A7II-01A |
| TCGA-DD-AAVR-01A | TCGA-FV-A23B-01A |
| TCGA-CC-A7IL-01A | TCGA-RC-A7SB-01A |
| TCGA-2Y-A9H3-01A | TCGA-CC-5261-01A |
| TCGA-UB-A7ME-01A | TCGA-DD-AADR-01A |
| TCGA-DD-AACH-01A | TCGA-DD-A4ND-01A |
| TCGA-5R-AA1C-01A | TCGA-CC-A5UD-01A |
| TCGA-DD-A3A1-01A | TCGA-DD-A39Y-01A |
| TCGA-ED-A4XI-01A | TCGA-G3-A5SI-01A |
| TCGA-DD-A11A-01A | TCGA-KR-A7K8-01A |
| TCGA-ED-A7XO-01A | TCGA-2Y-A9H2-01A |
| TCGA-CC-A8HS-01A | TCGA-WX-AA46-01A |
| TCGA-LG-A6GG-01A | TCGA-2Y-A9GT-01A |
| TCGA-CC-A3MA-01A | TCGA-DD-AACX-01A |
| TCGA-CC-5263-01A | TCGA-DD-AADN-01A |
| TCGA-BW-A5NP-01A | TCGA-ED-A459-01A |
| TCGA-FV-A4ZQ-01A | TCGA-DD-A11D-01A |
| TCGA-ZS-A9CE-01A | TCGA-DD-AADQ-01A |
| TCGA-DD-A1EC-01A | TCGA-BC-A217-01A |
| TCGA-ZP-A9CY-01A | TCGA-CC-5259-01A |
| TCGA-GJ-A6C0-01A | TCGA-2Y-A9H4-01A |
| TCGA-DD-A4NQ-01A | TCGA-KR-A7K2-01A |
| TCGA-DD-AACU-01A | TCGA-3K-AAZ8-01A |
| TCGA-WX-AA47-01A | TCGA-DD-AA3A-01A |
| TCGA-2Y-A9GV-01A | TCGA-FV-A4ZP-01A |
| TCGA-G3-AAV1-01A | TCGA-2Y-A9H5-01A |
| TCGA-DD-A4NK-01A | TCGA-DD-A1EF-01A |
| TCGA-BC-A10S-01A | TCGA-CC-A3MB-01A |
| TCGA-5C-A9VG-01A | TCGA-DD-AAD6-01A |
| TCGA-DD-AAE4-01A | TCGA-G3-A25X-01A |
| TCGA-2Y-A9H0-01A | TCGA-DD-A11C-01A |
| TCGA-RC-A7SF-01A | TCGA-DD-A73A-01A |
| TCGA-MI-A75H-01A | TCGA-DD-AAEG-01A |
| TCGA-DD-A3A0-01A | TCGA-DD-AADO-01A |
| TCGA-BC-A10Y-01A | TCGA-FV-A3II-01A |
| TCGA-DD-AAVQ-01A | TCGA-CC-5260-01A |
| TCGA-DD-AACW-01A | TCGA-LG-A9QD-01A |

|                                                                                         |                  |                  |
|-----------------------------------------------------------------------------------------|------------------|------------------|
|                                                                                         | TCGA-CC-A9FV-01A | TCGA-BC-A69I-01A |
|                                                                                         | TCGA-ZP-A9CV-01A | TCGA-DD-AAEK-01A |
|                                                                                         | TCGA-DD-AAVV-01A | TCGA-UB-A7MA-01A |
|                                                                                         | TCGA-UB-A7MC-01A | TCGA-DD-AACJ-01A |
|                                                                                         | TCGA-DD-AADG-01A | TCGA-DD-AADV-01A |
|                                                                                         | TCGA-MI-A75I-01A | TCGA-BC-A10R-01A |
|                                                                                         | TCGA-FV-A2QQ-01A | TCGA-DD-AACT-01A |
|                                                                                         | TCGA-ED-A8O5-01A | TCGA-RC-A7S9-01A |
|                                                                                         | TCGA-RC-A6M4-01A | TCGA-DD-AAVY-01A |
|                                                                                         | TCGA-BC-A10X-01A | TCGA-DD-A4NR-01A |
|                                                                                         | TCGA-2Y-A9H6-01A | TCGA-DD-A118-01A |
|                                                                                         | TCGA-MR-A520-01A | TCGA-KR-A7K0-01A |
|                                                                                         | TCGA-BC-A8YO-01A | TCGA-XR-A8TG-01A |
|                                                                                         | TCGA-2Y-A9GS-01A | TCGA-RC-A7SK-01A |
|                                                                                         | TCGA-NI-A8LF-01A | TCGA-DD-AADL-01A |
|                                                                                         | TCGA-G3-AAUZ-01A | TCGA-FV-A495-01A |
|                                                                                         | TCGA-DD-AACO-01A | TCGA-G3-A7M7-01A |
|                                                                                         | TCGA-G3-A3CI-01A | TCGA-DD-AAW2-01A |
|                                                                                         | TCGA-DD-AAD1-01A | TCGA-DD-AAC9-01A |
|                                                                                         | TCGA-DD-AAE3-01A | TCGA-DD-AACB-01A |
|                                                                                         | TCGA-DD-AACZ-01A | TCGA-BW-A5NO-01A |
|                                                                                         | TCGA-DD-AADB-01A | TCGA-G3-A25Z-01A |
|                                                                                         | TCGA-DD-A73D-01A | TCGA-BW-A5NQ-01A |
|                                                                                         | TCGA-BD-A3ER-01A | TCGA-G3-A25V-01A |
|                                                                                         | TCGA-DD-AADE-01A | TCGA-G3-A3CG-01A |
|                                                                                         | TCGA-XR-A8TF-01A | TCGA-DD-AADU-01A |
| <b>The accession number of DNA methylation profiles of 50 adjacent nontumor samples</b> | TCGA-EP-A26S-11A | TCGA-DD-A3A3-11A |
|                                                                                         | TCGA-DD-A11B-11A | TCGA-BC-A110-11A |
|                                                                                         | TCGA-DD-A1EB-11A | TCGA-DD-A116-11A |
|                                                                                         | TCGA-DD-A39W-11A | TCGA-BC-A10Y-11A |
|                                                                                         | TCGA-DD-A1EJ-11A | TCGA-BC-A10W-11A |
|                                                                                         | TCGA-DD-A3A2-11A | TCGA-EP-A12J-11A |
|                                                                                         | TCGA-DD-A39V-11A | TCGA-DD-A1E9-11A |
|                                                                                         | TCGA-DD-A11C-11A | TCGA-DD-A39Z-11A |
|                                                                                         | TCGA-DD-A1EH-11A | TCGA-DD-A1EF-11A |
|                                                                                         | TCGA-DD-A1EG-11A | TCGA-DD-A114-11A |
|                                                                                         | TCGA-BD-A2L6-11A | TCGA-DD-A1EE-11A |
|                                                                                         | TCGA-DD-A1EC-11A | TCGA-BD-A3EP-11A |
|                                                                                         | TCGA-DD-A1EI-11A | TCGA-ES-A2HT-11A |
|                                                                                         | TCGA-G3-A25X-11A | TCGA-DD-A39X-11A |
|                                                                                         | TCGA-BC-A112-11A | TCGA-BC-A10U-11A |
|                                                                                         | TCGA-BC-A10Z-11A | TCGA-DD-A11A-11A |
|                                                                                         | TCGA-G3-A25W-11A | TCGA-BC-A10T-11A |

|  |                  |                  |
|--|------------------|------------------|
|  | TCGA-BC-A10Q-11A | TCGA-DD-A119-11A |
|  | TCGA-DD-A1ED-11A | TCGA-FV-A2QR-11A |
|  | TCGA-FV-A23B-11A | TCGA-DD-A3A1-11A |
|  | TCGA-DD-A113-11A | TCGA-BC-A10X-11A |
|  | TCGA-BC-A216-11A | TCGA-DD-A1EL-11A |
|  | TCGA-BC-A10R-11A | TCGA-ES-A2HS-11A |
|  | TCGA-BC-A10S-11A | TCGA-DD-A118-11A |
|  | TCGA-DD-A11D-11A | TCGA-DD-A115-11A |

**Table S2. Primers for DNA methylation.**

| CpG                         | Primer name     | Primer sequence                |
|-----------------------------|-----------------|--------------------------------|
| <b>SPP1-<br/>cg15460348</b> | cg15460348-F    | GTTGGGTAGTGGTAGAAAATTTTATGAT   |
|                             | cg15460348-Rbio | AACTAAATACACAACCCAATAACAAACT   |
|                             | cg15460348-S    | GGAGGAGGTAGAGTA                |
| <b>LCAT-<br/>cg01817009</b> | cg01817009-F    | AGTTGAGTTGAGGTTTGATTTTTTTAATAA |
|                             | cg01817009-Rbio | CCATCCAACCCTAATACCTAC          |
|                             | cg01817009-S    | TTGGAGTTAAGAGAAGAAGG           |

**Table S3. Primers for real-time PCR.**

| Gene         | Forward (5' to 3')    | Reverse (5' to 3')    |
|--------------|-----------------------|-----------------------|
| <b>GAPDH</b> | TGACTTCAACAGCGACACCCA | CACCCTGTTGCTGTAGCCAAA |
| <b>SPP1</b>  | TTTCGCAGACCTGACATCCA  | TCCTCGCTTTCATGTGTGA   |
| <b>LCAT</b>  | GCTCCATCAAGCCCATGCT   | TCAGCTTGATGCTGGACATGA |

**Table S4. MethylMix models for DNA methylation-driven genes.**

| Gene    | Normal mean DNA methylation | Tumor mean DNA methylation | Log FC   | P value  | Adjust P value | Pearson correlation | Pearson correlation P value |
|---------|-----------------------------|----------------------------|----------|----------|----------------|---------------------|-----------------------------|
| ANGPTL7 | 0.598501                    | 0.894349                   | 0.579483 | 4.15E-27 | 9.42E-25       | -0.67466            | 1.35E-50                    |
| TGIF2LX | 0.501591                    | 0.236446                   | -1.085   | 3.49E-25 | 7.92E-23       | -0.34723            | 5.95E-12                    |
| ODAM    | 0.906667                    | 0.73878                    | -0.29543 | 3.09E-24 | 7.01E-22       | -0.51104            | 4.50E-26                    |
| GPR182  | 0.708214                    | 0.813501                   | 0.199958 | 3.23E-24 | 7.32E-22       | -0.33924            | 1.92E-11                    |
| FAM99A  | 0.455835                    | 0.602568                   | 0.402611 | 5.74E-23 | 1.30E-20       | -0.43279            | 2.28E-18                    |
| JDP2    | 0.216939                    | 0.321226                   | 0.566295 | 8.89E-23 | 2.02E-20       | -0.43343            | 2.01E-18                    |

|           |          |          |          |          |          |          |          |
|-----------|----------|----------|----------|----------|----------|----------|----------|
| MAGEC1    | 0.703253 | 0.466534 | -0.59206 | 3.08E-21 | 7.00E-19 | -0.43564 | 1.29E-18 |
| DKK3      | 0.200757 | 0.3756   | 0.903744 | 5.00E-21 | 1.14E-18 | -0.44261 | 3.14E-19 |
| UHL1      | 0.342469 | 0.485864 | 0.504577 | 8.44E-21 | 1.92E-18 | -0.3424  | 1.21E-11 |
| LINC00898 | 0.768676 | 0.490118 | -0.64925 | 1.89E-20 | 4.28E-18 | -0.3682  | 2.35E-13 |
| TRIM17    | 0.193816 | 0.338073 | 0.802649 | 9.28E-20 | 2.11E-17 | -0.41119 | 1.44E-16 |
| C1QTNF3   | 0.654725 | 0.750183 | 0.196354 | 1.61E-19 | 3.65E-17 | -0.43516 | 1.42E-18 |
| COX7B2    | 0.301777 | 0.184913 | -0.70663 | 1.91E-19 | 4.33E-17 | -0.47846 | 1.27E-22 |
| MAGEB16   | 0.680121 | 0.564756 | -0.26816 | 2.26E-19 | 5.13E-17 | -0.32649 | 1.16E-10 |
| NAA11     | 0.555313 | 0.396814 | -0.48484 | 2.80E-19 | 6.35E-17 | -0.33419 | 3.95E-11 |
| MKRN3     | 0.658892 | 0.459853 | -0.51887 | 2.83E-19 | 6.42E-17 | -0.70003 | 6.47E-56 |
| CSAG1     | 0.738375 | 0.574815 | -0.36126 | 8.55E-19 | 1.94E-16 | -0.37288 | 1.11E-13 |
| KRBA1     | 0.534854 | 0.621566 | 0.216761 | 2.08E-18 | 4.72E-16 | -0.34984 | 4.03E-12 |
| GSTM5     | 0.411439 | 0.544014 | 0.402966 | 2.25E-18 | 5.10E-16 | -0.46833 | 1.27E-21 |
| BEND6     | 0.09519  | 0.26153  | 1.4581   | 2.42E-18 | 5.50E-16 | -0.51449 | 1.85E-26 |
| RNF17     | 0.692757 | 0.543301 | -0.3506  | 2.89E-18 | 6.56E-16 | -0.44649 | 1.41E-19 |
| HIST1H2BH | 0.146557 | 0.43179  | 1.55887  | 5.70E-18 | 1.29E-15 | -0.36882 | 2.13E-13 |
| MAGEA8    | 0.727395 | 0.560352 | -0.37641 | 1.01E-17 | 2.29E-15 | -0.32102 | 2.44E-10 |
| LINC00944 | 0.417986 | 0.271015 | -0.62508 | 1.04E-17 | 2.36E-15 | -0.37106 | 1.49E-13 |
| LCAT      | 0.532415 | 0.656223 | 0.301636 | 1.40E-17 | 3.18E-15 | -0.64571 | 3.81E-45 |
| LINC00200 | 0.436666 | 0.319289 | -0.45167 | 2.67E-17 | 6.07E-15 | -0.32334 | 1.78E-10 |
| SLC17A8   | 0.415919 | 0.578276 | 0.475457 | 4.71E-17 | 1.07E-14 | -0.32409 | 1.61E-10 |
| ENTPD3    | 0.330597 | 0.516098 | 0.642571 | 1.13E-16 | 2.57E-14 | -0.36158 | 6.69E-13 |

|            |          |          |          |          |          |          |          |
|------------|----------|----------|----------|----------|----------|----------|----------|
| STMN3      | 0.080743 | 0.211193 | 1.387146 | 1.31E-16 | 2.96E-14 | -0.49185 | 5.38E-24 |
| ANKRD33    | 0.390602 | 0.493575 | 0.337568 | 1.88E-16 | 4.26E-14 | -0.46628 | 2.00E-21 |
| ADAM32     | 0.318046 | 0.497486 | 0.645419 | 2.73E-16 | 6.20E-14 | -0.44481 | 2.00E-19 |
| TCTEX1D1   | 0.235818 | 0.384072 | 0.703701 | 7.32E-16 | 1.66E-13 | -0.33879 | 2.04E-11 |
| LINC00879  | 0.893655 | 0.70652  | -0.33899 | 1.25E-15 | 2.84E-13 | -0.51063 | 5.01E-26 |
| TUBA3C     | 0.41818  | 0.322818 | -0.3734  | 2.20E-15 | 4.99E-13 | -0.44215 | 3.45E-19 |
| HIST3H2A   | 0.072431 | 0.271865 | 1.908207 | 2.59E-15 | 5.88E-13 | -0.63643 | 1.61E-43 |
| XAGE5      | 0.620743 | 0.479322 | -0.373   | 3.29E-15 | 7.47E-13 | -0.52774 | 5.44E-28 |
| DDX53      | 0.511247 | 0.33817  | -0.59627 | 3.87E-15 | 8.79E-13 | -0.5252  | 1.08E-27 |
| FITM1      | 0.351238 | 0.455706 | 0.375657 | 4.40E-15 | 1.00E-12 | -0.54736 | 2.21E-30 |
| NOVA1      | 0.080724 | 0.160377 | 0.990408 | 6.31E-15 | 1.43E-12 | -0.44724 | 1.21E-19 |
| RFPL4B     | 0.806643 | 0.681103 | -0.24406 | 1.60E-14 | 3.63E-12 | -0.44612 | 1.52E-19 |
| SYNGR3     | 0.219426 | 0.54137  | 1.302884 | 1.92E-14 | 4.36E-12 | -0.37671 | 5.92E-14 |
| PES1P1     | 0.611819 | 0.399132 | -0.61624 | 2.04E-14 | 4.64E-12 | -0.55678 | 1.37E-31 |
| PDK4       | 0.583225 | 0.783482 | 0.425848 | 2.05E-14 | 4.66E-12 | -0.44225 | 3.38E-19 |
| MT1M       | 0.238817 | 0.327249 | 0.454488 | 6.18E-14 | 1.40E-11 | -0.38431 | 1.67E-14 |
| PNMA5      | 0.798526 | 0.672379 | -0.24807 | 1.05E-13 | 2.39E-11 | -0.45809 | 1.20E-20 |
| MT3        | 0.196294 | 0.322219 | 0.715026 | 2.54E-13 | 5.77E-11 | -0.33453 | 3.76E-11 |
| DYDC1      | 0.23868  | 0.358606 | 0.587318 | 4.04E-13 | 9.18E-11 | -0.39185 | 4.59E-15 |
| LINC01093  | 0.357267 | 0.48761  | 0.448726 | 4.51E-13 | 1.02E-10 | -0.6133  | 1.05E-39 |
| S100A10    | 0.335772 | 0.221842 | -0.59795 | 5.46E-13 | 1.24E-10 | -0.60693 | 1.05E-38 |
| AC126407.1 | 0.736504 | 0.599793 | -0.29623 | 5.72E-13 | 1.30E-10 | -0.32841 | 8.87E-11 |

|           |          |          |          |          |          |          |          |
|-----------|----------|----------|----------|----------|----------|----------|----------|
| KLHL35    | 0.263677 | 0.341921 | 0.374887 | 6.12E-13 | 1.39E-10 | -0.41297 | 1.03E-16 |
| GFRA3     | 0.534313 | 0.667395 | 0.320856 | 6.70E-13 | 1.52E-10 | -0.47145 | 6.29E-22 |
| PRDM9     | 0.420626 | 0.300465 | -0.48534 | 1.47E-12 | 3.34E-10 | -0.43057 | 3.54E-18 |
| ZFPM2-AS1 | 0.796561 | 0.494947 | -0.68651 | 2.80E-12 | 6.36E-10 | -0.41821 | 3.86E-17 |
| SALL4     | 0.584291 | 0.718151 | 0.2976   | 3.06E-12 | 6.95E-10 | -0.33116 | 6.04E-11 |
| SLITRK3   | 0.107373 | 0.193864 | 0.852406 | 3.97E-12 | 9.00E-10 | -0.34587 | 7.28E-12 |
| C5orf58   | 0.519425 | 0.401992 | -0.36975 | 6.21E-12 | 1.41E-09 | -0.43281 | 2.27E-18 |
| RASL12    | 0.398482 | 0.555636 | 0.479625 | 1.05E-11 | 2.39E-09 | -0.47505 | 2.78E-22 |
| NAT2      | 0.635021 | 0.75559  | 0.250798 | 1.31E-11 | 2.97E-09 | -0.59698 | 3.41E-37 |
| CKMT2     | 0.448224 | 0.592035 | 0.401461 | 2.03E-11 | 4.61E-09 | -0.54699 | 2.45E-30 |
| GTSF1     | 0.562248 | 0.460025 | -0.2895  | 2.57E-11 | 5.84E-09 | -0.65595 | 5.25E-47 |
| TNNC1     | 0.848651 | 0.709832 | -0.25769 | 2.64E-11 | 5.99E-09 | -0.64657 | 2.68E-45 |
| LINC01139 | 0.30003  | 0.218458 | -0.45775 | 4.46E-11 | 1.01E-08 | -0.39101 | 5.31E-15 |
| MAGEB1    | 0.72781  | 0.611517 | -0.25117 | 6.95E-11 | 1.58E-08 | -0.3409  | 1.51E-11 |
| LRRC4     | 0.429583 | 0.538122 | 0.324998 | 6.36E-10 | 1.44E-07 | -0.37757 | 5.13E-14 |
| NSUN7     | 0.276594 | 0.432818 | 0.645988 | 1.03E-09 | 2.35E-07 | -0.67917 | 1.67E-51 |
| GSTM1     | 0.146627 | 0.292363 | 0.995615 | 1.40E-09 | 3.17E-07 | -0.67576 | 8.09E-51 |
| ZNF192P1  | 0.254025 | 0.364523 | 0.521041 | 2.16E-09 | 4.91E-07 | -0.32011 | 2.76E-10 |
| CYP2C9    | 0.437312 | 0.544959 | 0.317487 | 3.42E-09 | 7.76E-07 | -0.6621  | 3.71E-48 |
| SLC16A11  | 0.092765 | 0.085291 | -0.12119 | 3.96E-09 | 8.98E-07 | -0.41879 | 3.46E-17 |
| MYCBPAP   | 0.383404 | 0.505397 | 0.398552 | 4.46E-09 | 1.01E-06 | -0.37818 | 4.64E-14 |
| ARHGAP10  | 0.225821 | 0.379768 | 0.749936 | 5.02E-09 | 1.14E-06 | -0.33747 | 2.47E-11 |

|                |          |          |          |              |              |          |              |
|----------------|----------|----------|----------|--------------|--------------|----------|--------------|
| ANKRD3<br>0A   | 0.648031 | 0.552116 | -0.23109 | 5.37E-<br>09 | 1.22E-<br>06 | -0.33653 | 2.83E-<br>11 |
| MT1E           | 0.077442 | 0.14722  | 0.926785 | 9.44E-<br>09 | 2.14E-<br>06 | -0.48704 | 1.70E-<br>23 |
| CALCA          | 0.216619 | 0.300914 | 0.474192 | 1.77E-<br>08 | 4.01E-<br>06 | -0.34436 | 9.09E-<br>12 |
| TINAG          | 0.478898 | 0.387916 | -0.30398 | 2.58E-<br>08 | 5.86E-<br>06 | -0.42165 | 2.01E-<br>17 |
| STAU2-<br>AS1  | 0.85309  | 0.668534 | -0.3517  | 3.32E-<br>08 | 7.53E-<br>06 | -0.3448  | 8.52E-<br>12 |
| ZNF391         | 0.06984  | 0.168045 | 1.266723 | 3.91E-<br>08 | 8.88E-<br>06 | -0.55346 | 3.69E-<br>31 |
| ZNF83          | 0.087857 | 0.157465 | 0.841808 | 4.88E-<br>08 | 1.11E-<br>05 | -0.52165 | 2.81E-<br>27 |
| TMEM22<br>0    | 0.240233 | 0.286961 | 0.256425 | 4.93E-<br>08 | 1.12E-<br>05 | -0.55621 | 1.62E-<br>31 |
| CDS1           | 0.102036 | 0.215762 | 1.080364 | 8.89E-<br>08 | 2.02E-<br>05 | -0.4813  | 6.57E-<br>23 |
| ESYT3          | 0.158918 | 0.215606 | 0.440115 | 1.01E-<br>07 | 2.29E-<br>05 | -0.34426 | 9.22E-<br>12 |
| P3H4           | 0.679843 | 0.733163 | 0.108931 | 1.42E-<br>07 | 3.23E-<br>05 | -0.44547 | 1.74E-<br>19 |
| EFNA5          | 0.055641 | 0.129111 | 1.214406 | 1.65E-<br>07 | 3.75E-<br>05 | -0.34631 | 6.82E-<br>12 |
| ADAD1          | 0.69508  | 0.629793 | -0.1423  | 2.67E-<br>07 | 6.05E-<br>05 | -0.36899 | 2.07E-<br>13 |
| AC00468<br>7.1 | 0.611795 | 0.664017 | 0.118171 | 2.90E-<br>07 | 6.57E-<br>05 | -0.52703 | 6.60E-<br>28 |
| NRBF2P<br>2    | 0.921541 | 0.814751 | -0.17769 | 2.91E-<br>07 | 6.61E-<br>05 | -0.37565 | 7.04E-<br>14 |
| ZNF233         | 0.208604 | 0.325114 | 0.640179 | 4.19E-<br>07 | 9.51E-<br>05 | -0.51179 | 3.72E-<br>26 |
| SLC22A3<br>1   | 0.159581 | 0.252618 | 0.662668 | 5.88E-<br>07 | 0.00013<br>3 | -0.47011 | 8.51E-<br>22 |
| GNG4           | 0.158714 | 0.269295 | 0.762754 | 7.23E-<br>07 | 0.00016<br>4 | -0.44282 | 3.00E-<br>19 |
| LAMA4          | 0.548516 | 0.601644 | 0.133377 | 1.03E-<br>06 | 0.00023<br>4 | -0.35988 | 8.72E-<br>13 |
| BATF           | 0.486851 | 0.552633 | 0.182843 | 1.08E-<br>06 | 0.00024<br>5 | -0.52157 | 2.86E-<br>27 |
| LINC004<br>82  | 0.149412 | 0.104104 | -0.52127 | 1.31E-<br>06 | 0.00029<br>7 | -0.33246 | 5.04E-<br>11 |
| EPHA6          | 0.106792 | 0.173673 | 0.70157  | 2.25E-<br>06 | 0.00051<br>1 | -0.33381 | 4.16E-<br>11 |

|            |          |          |          |          |          |          |          |
|------------|----------|----------|----------|----------|----------|----------|----------|
| CTHRC1     | 0.227724 | 0.375331 | 0.720878 | 2.49E-06 | 0.000565 | -0.4043  | 5.06E-16 |
| INHBC      | 0.487212 | 0.623443 | 0.355708 | 2.92E-06 | 0.000663 | -0.44539 | 1.77E-19 |
| RARRES2P6  | 0.733575 | 0.535315 | -0.45456 | 3.13E-06 | 0.00071  | -0.3287  | 8.52E-11 |
| GULP1      | 0.185852 | 0.250788 | 0.432314 | 3.43E-06 | 0.00078  | -0.34539 | 7.82E-12 |
| ZNF382     | 0.105092 | 0.258652 | 1.299361 | 4.91E-06 | 0.001114 | -0.70833 | 8.90E-58 |
| PLEK2      | 0.26863  | 0.358336 | 0.41569  | 5.54E-06 | 0.001257 | -0.4536  | 3.15E-20 |
| LUZP4      | 0.797734 | 0.664838 | -0.2629  | 5.82E-06 | 0.001322 | -0.32171 | 2.22E-10 |
| SSX1       | 0.848815 | 0.686323 | -0.30656 | 6.12E-06 | 0.001389 | -0.67152 | 5.63E-50 |
| RBP2       | 0.729655 | 0.656266 | -0.15293 | 6.96E-06 | 0.001579 | -0.32045 | 2.64E-10 |
| EPCAM      | 0.298165 | 0.346537 | 0.216898 | 8.57E-06 | 0.001945 | -0.38196 | 2.47E-14 |
| PON3       | 0.116791 | 0.106157 | -0.13772 | 9.24E-06 | 0.002097 | -0.35143 | 3.18E-12 |
| HIST1H2AE  | 0.051308 | 0.09791  | 0.932258 | 1.17E-05 | 0.002665 | -0.38395 | 1.77E-14 |
| PRSS3      | 0.299422 | 0.380606 | 0.346117 | 1.56E-05 | 0.003535 | -0.56931 | 2.97E-33 |
| RPS6KA6    | 0.185734 | 0.286761 | 0.626612 | 1.67E-05 | 0.003781 | -0.45695 | 1.54E-20 |
| C19orf33   | 0.480451 | 0.539113 | 0.166199 | 1.77E-05 | 0.004009 | -0.59168 | 2.07E-36 |
| G0S2       | 0.121895 | 0.108545 | -0.16735 | 2.32E-05 | 0.00526  | -0.35062 | 3.59E-12 |
| CLGN       | 0.046231 | 0.070765 | 0.614178 | 2.49E-05 | 0.00565  | -0.40385 | 5.49E-16 |
| B3GALNT1   | 0.295373 | 0.371333 | 0.330173 | 2.52E-05 | 0.005712 | -0.52844 | 4.51E-28 |
| PLEKHS1    | 0.636129 | 0.662754 | 0.059155 | 2.60E-05 | 0.005903 | -0.56951 | 2.79E-33 |
| MAT1A      | 0.205798 | 0.179779 | -0.19501 | 3.96E-05 | 0.008984 | -0.54405 | 5.73E-30 |
| NRSN2      | 0.216029 | 0.292712 | 0.438256 | 4.98E-05 | 0.011298 | -0.8062  | 3.98E-86 |
| PPP1R14BP2 | 0.271942 | 0.35202  | 0.372362 | 5.53E-05 | 0.012557 | -0.51155 | 3.96E-26 |



|         |          |          |          |          |          |          |          |
|---------|----------|----------|----------|----------|----------|----------|----------|
| IGF1    | 0.254084 | 0.354066 | 0.478714 | 5.72E-05 | 0.012995 | -0.71868 | 3.39E-60 |
| TM4SF19 | 0.654345 | 0.590597 | -0.14788 | 6.10E-05 | 0.013839 | -0.46573 | 2.26E-21 |
| PAX8    | 0.640223 | 0.694305 | 0.116995 | 6.19E-05 | 0.014059 | -0.56212 | 2.73E-32 |
| TAT     | 0.254916 | 0.313219 | 0.297146 | 7.34E-05 | 0.016655 | -0.69102 | 5.79E-54 |
| FBP1    | 0.088292 | 0.133794 | 0.599663 | 0.000108 | 0.024544 | -0.47534 | 2.60E-22 |
| ABCD1   | 0.349034 | 0.287752 | -0.27854 | 0.000147 | 0.03337  | -0.39084 | 5.47E-15 |
| SPP1    | 0.525435 | 0.426909 | -0.29959 | 0.000148 | 0.033621 | -0.6959  | 5.20E-55 |

**Table S5. Times of nonzero coefficients of 51 prognostic genes in 1000 LASSO analyses.**

| Gene       | Times |
|------------|-------|
| SPP1       | 1000  |
| LCAT       | 1000  |
| CYP2C9     | 993   |
| SLC16A11   | 977   |
| LINC00200  | 872   |
| GPR182     | 872   |
| ZFPM2-AS1  | 740   |
| AC004687.1 | 740   |
| ANKRD33    | 585   |
| TM4SF19    | 585   |
| TAT        | 420   |
| GSTM5      | 420   |
| MT3        | 420   |
| S100A10    | 420   |
| B3GALNT1   | 247   |
| ADAM32     | 11    |
| ADAD1      | 1     |
| LRRC4      | 1     |
| FAM99A     | 0     |
| CTHRC1     | 0     |
| LINC01139  | 0     |
| TMEM220    | 0     |
| RNF17      | 0     |
| PON3       | 0     |
| KRBA1      | 0     |
| PRDM9      | 0     |

|           |   |
|-----------|---|
| PDK4      | 0 |
| MAT1A     | 0 |
| LINC00879 | 0 |
| TGIF2LX   | 0 |
| IGF1      | 0 |
| ESYT3     | 0 |
| TINAG     | 0 |
| C5orf58   | 0 |
| EFNA5     | 0 |
| LINC01093 | 0 |
| FITM1     | 0 |
| CSAG1     | 0 |
| XAGE5     | 0 |
| GULP1     | 0 |
| RFPL4B    | 0 |
| MAGEA8    | 0 |
| EPHA6     | 0 |
| TUBA3C    | 0 |
| PES1P1    | 0 |
| FBP1      | 0 |
| INHBC     | 0 |
| ZNF391    | 0 |
| CDS1      | 0 |
| UCHL1     | 0 |
| NAA11     | 0 |

**Table S6. Correlation between the CpGs methylation in promoters and corresponding gene expression in the TCGA validation dataset.**

| CpG methylation | Gene expression | Pearson correlation | P value     |
|-----------------|-----------------|---------------------|-------------|
| cg15460348      | SPP1            | -0.742097867        | < 0.001     |
| cg20261167      | SPP1            | -0.713492599        | < 0.001     |
| cg00088885      | SPP1            | -0.398463823        | < 0.001     |
| cg00583003      | SPP1            | -0.103088098        | 0.047267673 |
| cg01817009      | LCAT            | -0.78326538         | < 0.001     |
| cg26924825      | LCAT            | -0.677728846        | < 0.001     |
| cg07207367      | LCAT            | -0.610172793        | < 0.001     |
| cg06134860      | LCAT            | -0.6058284          | < 0.001     |
| cg05233094      | LCAT            | -0.570366149        | < 0.001     |
| cg02564259      | LCAT            | -0.539081443        | < 0.001     |
| cg09581611      | LCAT            | -0.51464855         | < 0.001     |
| cg06839111      | LCAT            | -0.460697425        | < 0.001     |
| cg09495207      | LCAT            | -0.44978721         | < 0.001     |
| cg00594148      | LCAT            | -0.134918938        | 0.009315519 |

|            |      |              |             |
|------------|------|--------------|-------------|
| cg01489608 | LCAT | -0.098677906 | 0.057604233 |
| cg07599484 | LCAT | -0.065952667 | 0.204899923 |
| cg08944929 | LCAT | -0.037843008 | 0.467227055 |
